# Supplementary material
Source: publisher figshare collection journal article supplement (https://gsajournals.figshare.com/ndownloader/files/18509894)
Supplement: Supplementary file 1 [file 18509894]

## Sheet: Sheet1
Genome no.	Strain name	No. of accessory genes	No. of unique genes	No. of exclusively absent genes
1	7C	1156	0	1
2	FLAC003	728	117	17
3	FLAC004	1292	49	0
4	FLAC005	829	47	6
5	FLAC006	865	38	4
6	FLAC007	1141	1	3
7	FLAC008	1209	39	0
8	FLAC013	1123	15	6
9	FLAC028	1266	0	0
10	FLAC029	1261	0	0
11	FLAC030	818	64	3
12	FLAC031	1021	142	8
13	FLAC045	1312	8	2
14	FLAC046	1001	102	27
15	FLAC048	908	48	0
16	FLAC049	745	112	6
17	FLAC054	1401	2	0
18	FLAC055	1405	1	0
19	G141	960	8	2
20	G153	929	33	3
21	G220	810	60	38
22	GZ0 1	1014	20	58
23	GZ002	1147	16	2
24	NOV0213	1088	10	129
25	UC22	1048	198	38
